# Supplementary material
Source: PubMed Central journal article supplement (PMC1140416)
Supplement: pnas_0409482102_3.pdf [file pnas_0409482102_3.pdf]

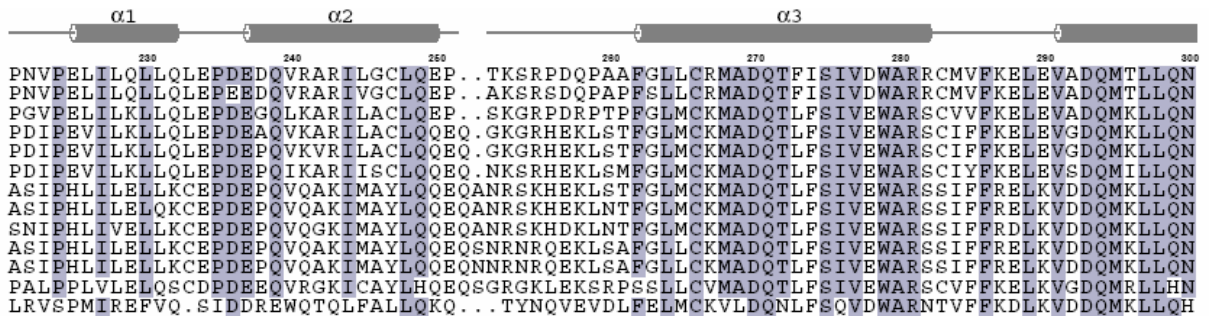

SF1\_human PNVPELILQLLQLEPDEDQVRARILGCLQEP..TKSRPDQPAAFGLLCRMADQTFISIVDWARRCMVFKLELEVADQMTLLQN  
 SF1\_mouse PNVPELILQLLQLEPEEDQVRARIVGCLQEP..AKSRSDQPAFFSLLCRMADQTFISIVDWARRCMVFKLELEVADQMTLLQN  
 SF1\_kangaroo PGVPELILKLLQLEPDEGQLKARILACLQEP..SKGRPDRPTPFGLMCKMADQTLFSEIVEWARS CVVFKLELEVADQMKLLQN  
 SF1\_chicken PDIPEVILKLLQLEPDEAQVKARILACLQEEQ.GKGRHEKLSLTFGLMCKMADQTLFSEIVEWARS CIPFKLELEVGDQMKLLQN  
 SF1\_turtle PDIPEVILKLLQLEPDEPQVKVRILACLQEEQ.GKGRHEKLSLTFGLMCKMADQTLFSEIVEWARS CIPFKLELEVGDQMKLLQN  
 SF1\_frog PDIPEVILKLLQLEPDEPQIKARIIISCLQEEQ.NKSRHEKLSMFGMLMCKMADQTLFSEIVEWARS CIPFKLELEVSDQMI LLQN  
 LRHI\_human ASIPHLILELLKCEPDEPQVQAKIMAYLQEEQANRSKHEKLSLTFGLMCKMADQTLFSEIVEWARS IPFRELKVDDQMKLLQN  
 LRHI\_chicken ASIPHLILELLKCEPDEPQVQAKIMAYLQEEQANRSKHEKLSLTFGLMCKMADQTLFSEIVEWARS IPFRELKVDDQMKLLQN  
 LRHI\_frog SNIPHLIVLELLKCEPDEPQVQKIMAYLQEEQANRSKHDKLNTPGLMCKMADQTLFSEIVEWARS IPFRDLKVDDQMKLLQN  
 LRHI\_mouse ASIPHLILELLKCEPDEPQVQAKIMAYLQEEQSNRNROEKLSAFGLLCKMADQTLFSEIVEWARS IPFRELKVDDQMKLLQN  
 LRHI\_rat ASIPHLILELLKCEPDEPQVQAKIMAYLQEEQNNRNROEKLSAFGLLCKMADQTLFSEIVEWARS IPFRELKVDDQMKLLQN  
 FF1B PALPELVLELQSCDPEDEQVRGKICAYLHQEQSGRGLKLEKSRPSSLCKVMADQTLFSEIVEWARS CVVFKLELEVGDQMKLLHN  
 FTZP1 LRVSPMIREFVQ.SIDDREWQTLFALLQKQ..TYNQVEVDLFEMLCKVLDQNLFSQVDWARNTVFPKDLKVDDQMKLLQH

2 2 \*\* 22\* \*\* 1 1 1 11 1 11

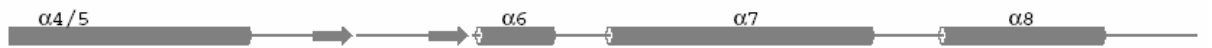

SF1\_human CWSELLVFDHIYRQVHGKEGSILLVTGQEVELTTVAQAAGSLLHSLVLR AQELVLQQLALQLDRQEFVCLKFLIFLSDLVK  
 SF1\_mouse CWSELLVLDHIYRQVYQYKEDSILLVTGQEVELSTVAVQAAGSLLHSLVLR AQELVLQQLHALQLDRQEFVCLKFLIFLSDLVK  
 SF1\_kangaroo CWSELLVFDHIYRQIQHGKEGSILLVTGQEVDLSTVAQAAGSLLHSLVLR AQDLVQQLHSLQVDRQEFVCLKFLIFLSDLVK  
 SF1\_chicken CWSELLVFDHVYRQIQHGKESVLLVTGQEVDLSTVAQAAGSILLHSLVLR AQELVLLHSLQVDRQEFVCLKFLIFLSDLVK  
 SF1\_turtle CWSELLVFDHIYRQVHGKESMILLVTGQEVEMATIAQAAGSLLHSLVLR AQELVLLHSLQVDRQEFVCLKFLIFLSDLVK  
 SF1\_frog CWSELLVFDHIYRQMHKSENSILLVTGQEIELSAIAQAAGSLLHSLVLR AQELVILLHSLQVDRQEFVCLKFLIFLSDLVK  
 LRHI\_human CWSELLILDHIYRQVHVKEGSIFLVTGQQVDYSIASQAAGATLNNLMSHAQELVAKLRS LQFDQREFVCLKFLVLFSSLDVK  
 LRHI\_chicken CWSELLILDHIYRQVHVHVKEGSILLVTGQQVDYSIASQAAGATLNNLMSHAQELVAKLRS LQFDLREFVCLKFLVLFSSLDVK  
 LRHI\_frog CWSELLILDHIYRQVHLHGKESILLVTGQQVDYSVIVTQAAGATLNNLMSHAQDLVAKLRS LQFDLREFVCLKFLVLFSSLDVK  
 LRHI\_mouse CWSELLILDHIYRQVHGKGTIFLVTGHEHVDYSTIISHTEVAFNNLLSLAQELVVR LRS LQFDQREFVCLKFLVLFSSDVK  
 LRHI\_rat CWSELLILDHIYRQVHGKGTIFLVTGHEHVDYSIISHTEVAFNNLLSLAQELVVR LRS LQFDQREFVCLKFLVLFSSDVK  
 FF1B CWSELLLDHICRQVHHRDGSLLITGQEVLSAVL.DAGPPLSSMVERGQDLSRRLQLLQVDSREMAACKFLILFNPNVK  
 FTZP1 SWS DMLVLDLHHR IHNGLPDETQ LNNGQVFNLM S L G . L L G . . V P Q L G D Y F N E L Q N K L Q D L K F D M G D Y V C M K F L I L L N P S V R

\* \* \* \* 2 \* 2 \* \* \* \* \*

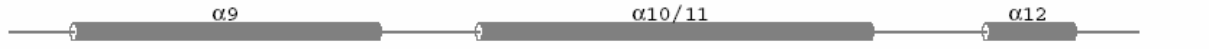

SF1\_human FLNNHILVKDAQEKANAALLDYTLCHYPHCGDKFQQLLLCLVEVRALSMQAEYLYHKHLGNEMPRNNLLIEMLQAKQT...  
 SF1\_mouse FLNNHSLVKDAQEKANAALLDYTLCHYPHCGDKFQQLLLCLVEVRALSMQAEYLYHKHLGNEMPRNNLLIEMLQAKQT...  
 SF1\_kangaroo FLENHGLAKDAQEKANSALLEYTMCHYPHCGDKFRQLLRRLAEVRSLSMQAEEYLYHKHLGGEVPCNNLLIEMLHAKRT...  
 SF1\_chicken YLENHALAKDAQEKANAALLEYTVCHYPHCTDKFRQLLRRLTEVRALSMQAEYLYHKHLGGEVPCNNLLIEMLHAKRT...  
 SF1\_turtle YLENHSLAKDAQEKANAALLEYTI CHYPHAADKFRQLLRRLAEIRLSMQAEEYLYHKHLGGEVPCNNLLIEMLHAKRT...  
 SF1\_frog FLENHSLAKSAQEKVDSALMEYTMCHYPHCTDKYRLLLRRLAEIRLSMQAEEYLYHKHLGGEVPCNNLLIEMLHAKRA...  
 LRHI\_human NLENFQLVEGVQEQVNAALLDYTM CNYPQOTEKFGQLLRRLPEIRAI SMQAEYLYYKHLNGDVPYNNLLIEMLHAKRA...  
 LRHI\_chicken NLENFQLVEGVQEQVNAALLDYTM CNYPQOTEKFGQLLRRLPEIRAI SMQAEYLYYKHLNGDVPYNNLLIEMLHAKRA...  
 LRHI\_frog TLENYQLVEGVQEQVNAALLDYTM CNYPQOTEKFGQLLRRLPEIRAI SLQAEYLYYKHLNGDVPYNNLLIEMLHAKRA...  
 LRHI\_mouse NLENLQLVEGVQEQVNAALLDYTM CNYPQOTEKFGQLLRRLPEIRAI SKQAEYLYYKHLVNGDVPYNNLLIEMLHAKRA...  
 LRHI\_rat NLENFQLVEGVQEQVNAALLDYTM CNYPQOTEKFGQLLRRLPEIRAI SKQAEYLYYKHLVNGDVPYNNLLIEMLHAKRA...  
 FF1B LLENPQFVESVQEQVNGALLEYTLFSYPQCVERFSQLILRLPELRSLSABAEDFLCYKHLGGEVPCNNLLIEMLHAKGSSAQ  
 FTZP1 GIVN R K T V S E G H D N V Q A A L L D Y T L T C Y P S V N D K F R G L V N I L P E I H A M A V R G E D H L Y T K C A G S A P T Q T L L M E M L H A K R K G . .

\* \*\* \* 1\* 11 1
