# Supplementary material
Source: PubMed Central journal article supplement (PMC1140416)

**A**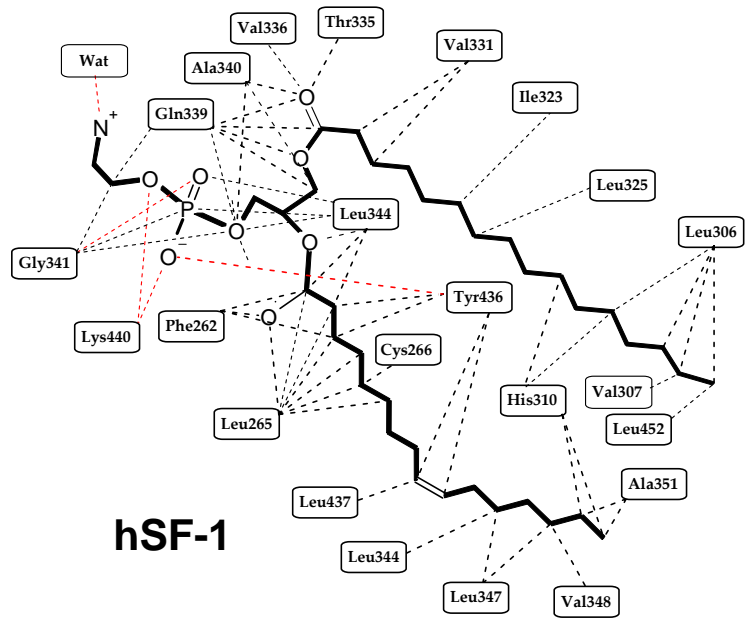**hSF-1****B**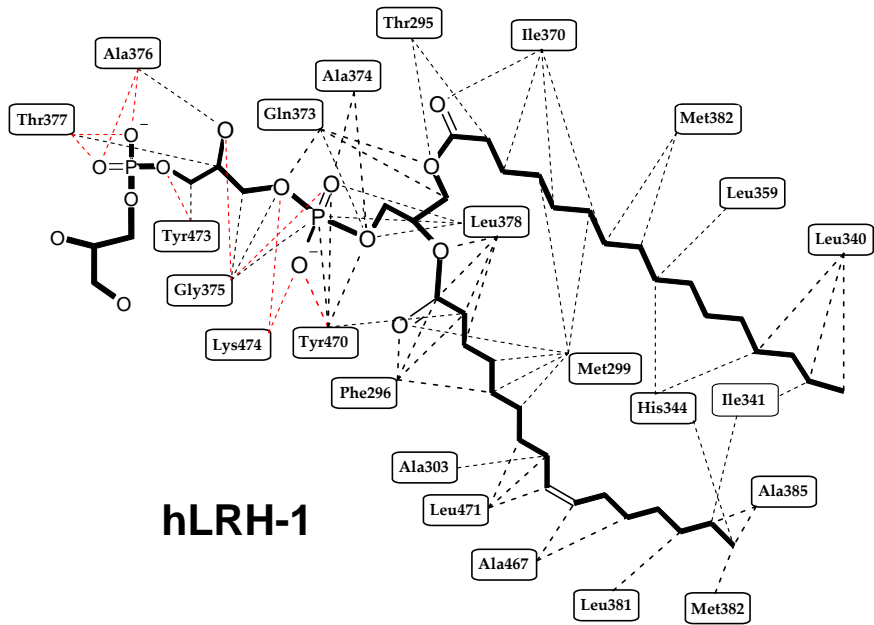**hLRH-1**

Supplement: pnas_0409482102_1.pdf [file pnas_0409482102_1.pdf]

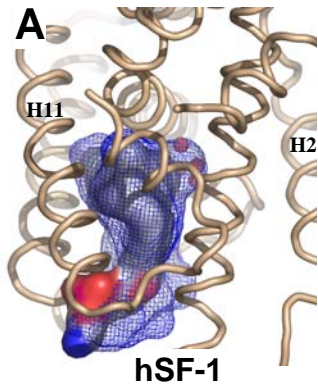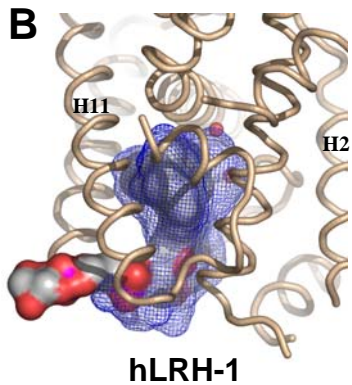

Supplement: pnas_0409482102_2.pdf [file pnas_0409482102_2.pdf]

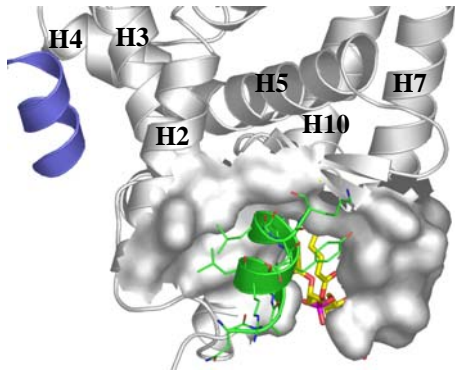

Supplement: pnas_0409482102_4.pdf [file pnas_0409482102_4.pdf]
